# Supplementary material
Source: PubMed Central journal article supplement (PMC3145076)
Supplement: 253_2011_3324_MOESM1_ESM.pdf [file 253_2011_3324_MOESM1_ESM.pdf]

**Supplementary information**

**Biochemical Characterization of the Carotenoid 1,2-Hydratases (CrtC)  
from *Rubrivivax gelatinosus* and *Thiocapsa roseopersicina***

Aida Hiseni, Isabel W.C.E. Arends and Linda G. Otten

*Biocatalysis and Organic Chemistry, Department of Biotechnology, Delft University of  
Technology, Julianalaan 136, Delft 2628 BL, The Netherlands. Tel: +31 15 2789969.  
Fax: +31 15 2781415. E-mail: L.G.Otten@tudelft.nl, URL: [www.bt.tudelft.nl/boc](http://www.bt.tudelft.nl/boc)*

**Supplementary Tab. 1** Bacterial strains and plasmids used in this study

| Strain and plasmid        | Relevant trait(s)                                                                                                                                                 | Source or reference   |
|---------------------------|-------------------------------------------------------------------------------------------------------------------------------------------------------------------|-----------------------|
| <b>Strains</b>            |                                                                                                                                                                   |                       |
| <i>E. coli</i> BL21 (DE3) | F <sup>-</sup> ompT gal dcm lon hsdS <sub>B</sub> (r <sub>B</sub> <sup>-</sup> m <sub>B</sub> <sup>-</sup> )<br>λ(DE3)                                            | Novagen               |
| <i>E. coli</i> TOP10      | F <sup>-</sup> mcrA Δ(mrr-hsdRMS-mcrBC)<br>φ80lacZΔM15 ΔlacX74 nupG recA1<br>araD139 Δ(ara-leu)7697 galE15 galK16<br>rpsL(Str <sup>R</sup> ) endA1 λ <sup>-</sup> | Invitrogen            |
| <b>Plasmids</b>           |                                                                                                                                                                   |                       |
| pPQE30crtC <sub>Rg</sub>  | pPQ30; carries the <i>Bam</i> HI/ <i>Kpn</i> I<br>fragment with <i>crtC</i> from <i>R. gelatinosus</i>                                                            | (Steiger et al. 2003) |
| pTcrt3                    | pBluescript SK(+); carries the wild-type<br><i>Bam</i> HI- <i>Sac</i> I fragment of the <i>crtDC</i><br>operon of <i>T. roseopersicina</i>                        | (Kovacs et al. 2003)  |
| pET15-b                   | <i>E. coli</i> general expression vector with<br>N-terminal His tag; Amp <sup>r</sup>                                                                             | Novagen               |
| pET15b_CrtC <sub>Rg</sub> | pET15-b with 1252-bp <i>Nde</i> I/ <i>Xho</i> I<br>fragment from pPQE30crtC <sub>Rg</sub>                                                                         | this work             |
| pET15b_CrtC <sub>Tr</sub> | pET15-b with 1249-bp <i>Nde</i> I/ <i>Xho</i> I<br>fragment from pTcrt3                                                                                           | this work             |

## Supplementary figures 1 – 5

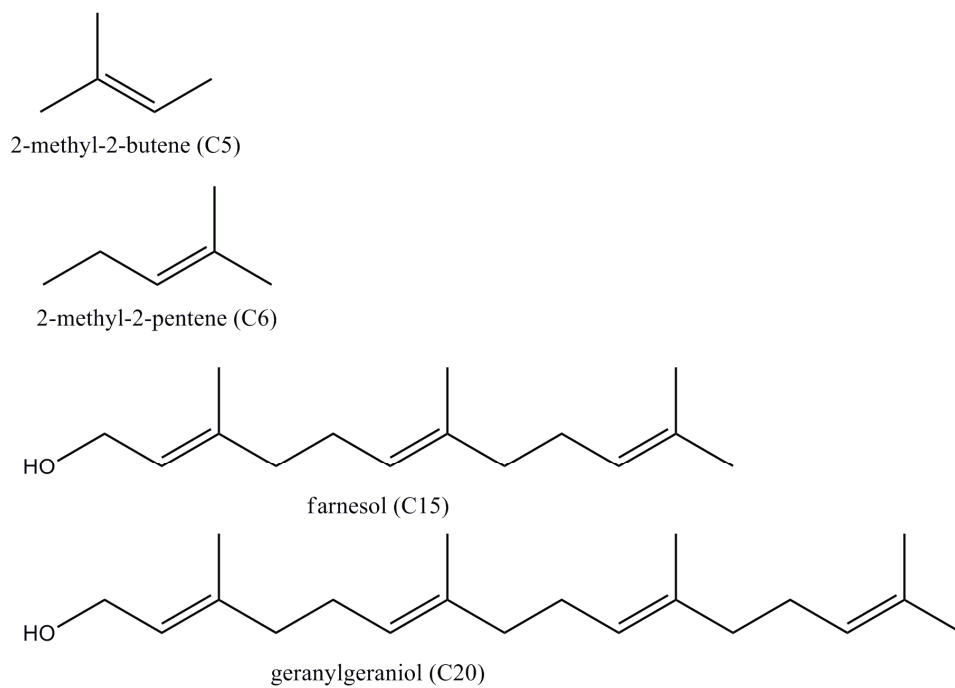

**Supplementary Fig. 1** Structure of substrates used for substrate specificity studies of *R. gelatinosus* and *T. roseopersicina* carotenoid 1,2-hydratase

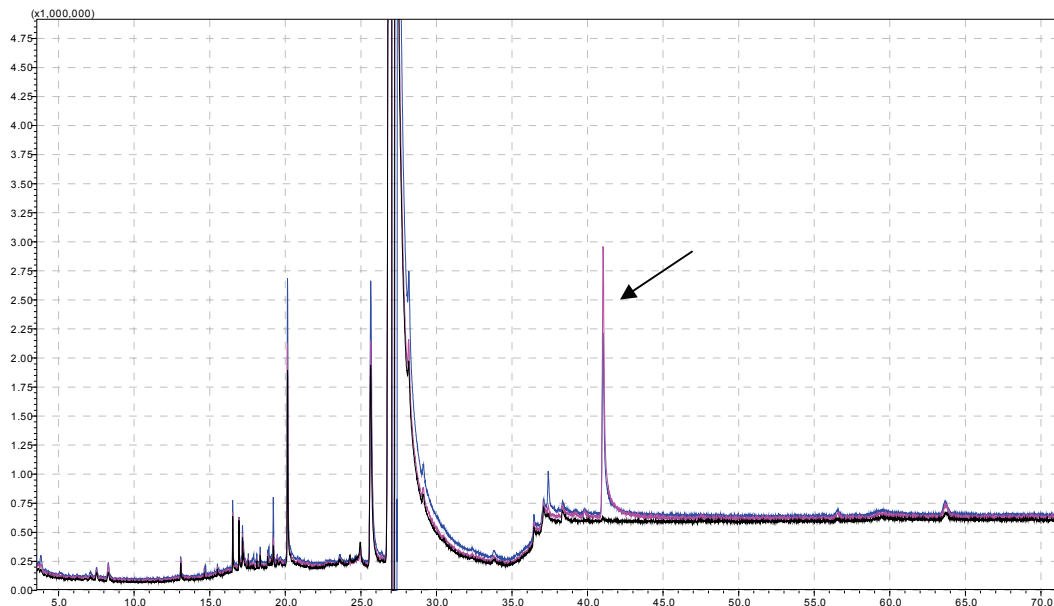

**Supplementary Fig. 2** GC separation of products formed *in vitro* by *Escherichia coli* extract expressing *RgCrtC* (*pink line*) and *TrCrtC* (*blue line*) using the substrate geranylgeraniol (RT 27 min). Obtained product is indicated with arrow (RT 41 min). Extract with empty vector pET15-b served as negative control (*black line*)

**a**

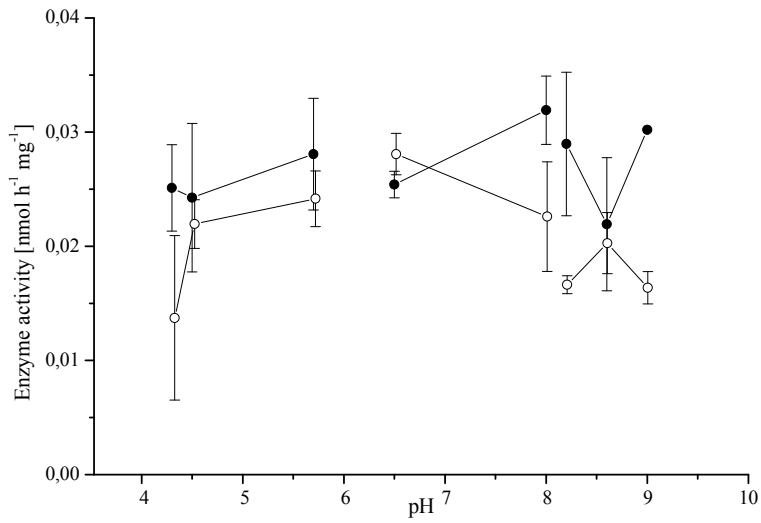

**b**

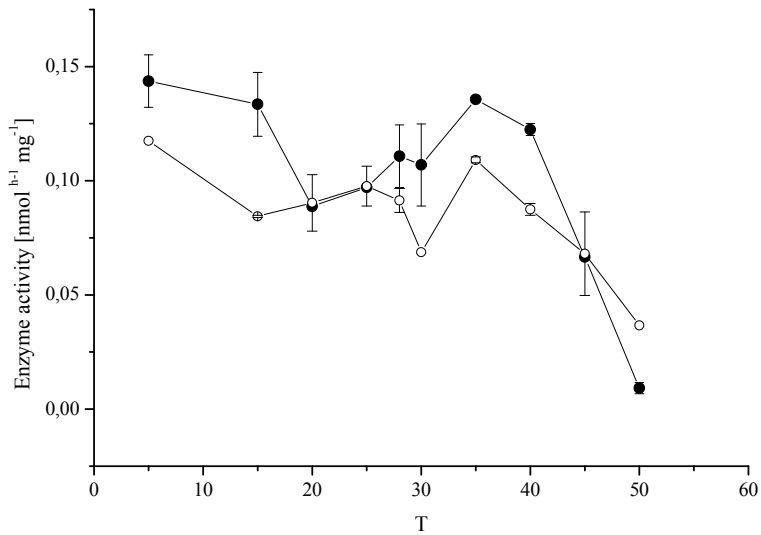

**Supplementary Fig. 3** Stability of *RgCrtC* (filled circle) and *TrCrtC* (empty circle) at different pH (a) and temperature (b) values. The remaining activity was assayed under standard assay conditions after the cell-free extracts had been incubated in the corresponding buffers (pH 4.3 to pH 9.0) or at the indicated temperature (5–50°C) in 50 mM Na<sub>2</sub>HPO<sub>4</sub> sodium phosphate (pH 8.0) for 30 min



**b**

```
RgCrtC      MRAAESGADARVRPVDRVEPADAPAGDAGGLRAAVPGDGGSAVRPGDARLDVLPVPPGLVD 60
TrCrtC      MRAAGILTPGALWAPGSDTRDERRHDAGRLQPALPGDGRGPLRPGVTRMEGLLHASSVA 60
          ****      : . : . . :. *      *** *:.*:**** ..:*** :*:: * : .. *

RgCrtC      EPAAGALPGGGQRAPGAGRADGGDVRVPGGRDADGAPRFDQPVPVPGGYLWVYVDAVSDDG 120
TrCrtC      QQGAGALSGRGERASGSRGTGGGHVGTGGSDPARGPRFDLRIIPGGYLWVYLDALSDDG 120
          : .****.* *:*.*:* :***.* . ** *. .**** .:*****:*:*:**

RgCrtC      RHGLTFIAFVGSVFSPPYAWAGGPKADRADPENHCALNIALYGDAGKRWTMTERGRRWMR 180
TrCrtC      DHGLTI IAMLGVSFSPYYAWAR--RRGNPDLNHCALNVALYKAGKRWTMTERGRKALR 178
          ****:*:*:*****      : ..** *****:****.*****:***:

RgCrtC      RSRDEFVIGPSRLHWDGESLLVEFDEVGVPPIPRRVKGRVVRVWPKALCRFVTSLDSGGRHR 240
TrCrtC      QAPGRLDIGPSHLTWDGTALTIDVNEITAPIPSRVGRIRVIPAAVNAREFTLPAERHV 238
          :: ..: *****: * ** :* :::*: .*** **:*:* * * :      :**.. **

RgCrtC      WGPIAPCSRLEVELDSPRVRWSGHAYLDSNEGDEPIDRPFREWDWSRATMADSSSTAVIYD 300
TrCrtC      WWPIAPISRVEVDLEKPALRWSGHGYLDSNRGEEPLEDAFQCWDWSRANTP-SGTTMLYD 297
          * **** **:*:*:*:. * :*****.*****.*:*:*: .*: ***** . *.*::**

RgCrtC      VRQKRDGDRVIAERFLLDGSTESFEAPPRQPLPTT-LWRIGRTMRTEPGVPALVEQTLED 359
TrCrtC      VTARHGTGASLALRFNASGEVEEFPVPRVRLPTTGIWRIKRGTCQCEAGHQARVETLED 357
          * :.. . :* ** .*.*. * .*** ***** :*** * : *. * * * :****

RgCrtC      TPFYARSMVRSGLLGEVVTSVHETMLLPRVITLPVRLMLPWRMPRA- 406
TrCrtC      TPFYARSLVETRLAGETATCVHESLSLDRFASPVVQLMLPFRMPRVGG 405
          *****:*.: * **..*.*****: * *. : *.*****:**** .
```

**Supplementary Fig. 4** DNA (a) and amino acid (b) sequence alignment of *RgCrtC* and *TrCrtC*. Identical bases/amino acids are highlighted with a star

**a**

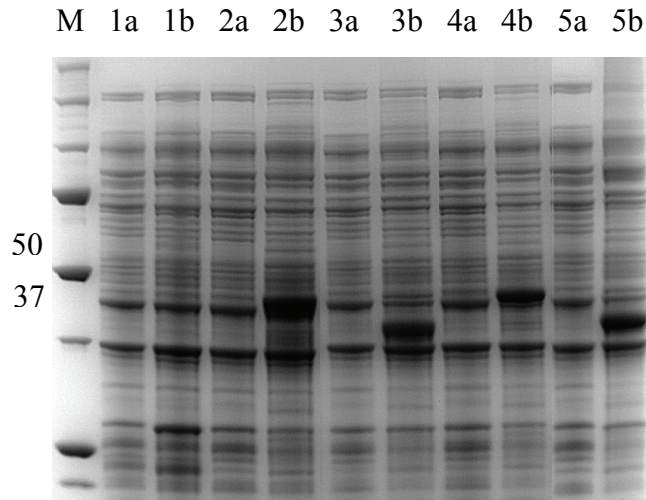

**b**

|          |     |                                                                                  |
|----------|-----|----------------------------------------------------------------------------------|
| RgCrtC   | 1   | MRAAESGADARVRPVDVPEPADAPAGDAGGLRAAVPGDGGSAVRPGDARLDVLPPEGLVDEPAAGALPGGGQRAPGAGRA |
| Rg_trunc | 1   | .....                                                                            |
| RgCrtC   | 81  | DGGDVRPVGGRDADGAPRFDQVPVPPGGYLWVYDAVSDDGRHGLTFIAFVGSVFSPPYAWAGGPKADRADPENHCALNIA |
| Rg_trunc | 25  | .....                                                                            |
| RgCrtC   | 161 | LYGDAGKRWTMTERGRRWMRRSRDEFVIGPSRLHWDGESLLVEFDEVGVPIPRRVKGRVVRWPKALCRFVTSLDSGGRHR |
| Rg_trunc | 105 | .....                                                                            |
| RgCrtC   | 241 | WGPIAPCSRIEVELDSPRVRWSGHAYLDSNEGDEPIDRPFREWDWSRATMADSSTAVIYDVRQKRDGDRVIAERFLDGS  |
| Rg_trunc | 185 | .....                                                                            |
| RgCrtC   | 321 | TESFEAPPRQPLPTTLWRIGRTMRTEPGVPALVEQTLEDTPFYARSMVRSGLLGEVVTSVHETMLLPRVITLPVRLMLPW |
| Rg_trunc | 265 | .....                                                                            |
| RgCrtC   | 401 | RMPRRA                                                                           |
| Rg_trunc | 345 | .....                                                                            |
| TrCrtC   | 1   | MRAAGILTPGALWAPGPSDTRDERRHDAGRIQPALPGDGRGPLRPGVTRMEGLLHASSVAQQGAGALSGRGERASGSRGT |
| Tr_trunc | 1   | .....                                                                            |
| TrCrtC   | 81  | DGGHVGTPGGSDPARGPRFDLRITPGGYLWVYLDALSDDGDHGLTIIAMLGSVFSPPYAWARRRGNPDPLNHCALNVALY |
| Tr_trunc | 36  | .....                                                                            |
| TrCrtC   | 161 | GKAGKRWTMTERGRKALRQAPGRLDIGPSHLTDWGTALTIDVNEITAPIPSRVGRIRVIPAANVAREFTLDPAERHVWV  |
| Tr_trunc | 116 | .....                                                                            |
| TrCrtC   | 241 | PIAPISRVEVDLEKPALRWSGHGYLDSNRGEEPLEDAFQCWDWSRANTPSGTTMLYDVTARHGTGASLALRFNASGEVEE |
| Tr_trunc | 196 | .....                                                                            |
| TrCrtC   | 321 | FPPPPRVRLPTTGIWRIKRGTOCEAGHQARVETLEDTPFYARSLVETRLAGETATCVHESLSLDRFASPVVQLMLPFRM  |
| Tr_trunc | 276 | .....                                                                            |
| TrCrtC   | 401 | PRVGG                                                                            |
| Tr_trunc | 356 | .....                                                                            |

**Supplementary Fig. 5** SDS-PAGE (10%) analysis (**a**) and amino acid sequence alignment (**b**) of the wildtype and the truncated CrtC. *M* Precision plus protein standard; *a* whole cells before induction; *b* whole cells after induction with 0.1 mM IPTG and expression overnight at 25°C; *1* pET15-b; *2* *TrCrtC* wildtype (38 and 44 kDa); *3* *TrCrtC* truncated (39 kDa); *4* *RgCrtC* wildtype (44 kDa); *5* *RgCrtC* truncated (39 kDa)
